# Supplementary material for: A High-Performance Coniform Helmholtz Resonator-Based Triboelectric Nanogenerator for Acoustic Energy Harvesting
Source: MDPI journal article supplement (doi:10.3390/nano11123431), 2021-12-17
Supplement: s1 [file s1]

# A High-Performance Coniform Helmholtz Resonator-Based Triboelectric Nanogenerator for Acoustic Energy Harvesting

Haichao Yuan <sup>1,†</sup>, Hongyong Yu <sup>1,†</sup>, Xiangyu Liu <sup>1</sup>, Hongfa Zhao <sup>2</sup>, Yiping Zhang <sup>1</sup>, Ziyue Xi <sup>1</sup>, Qiqi Zhang <sup>1</sup>, Ling Liu <sup>1</sup>, Yejin Lin <sup>1,\*</sup>, Xinxiang Pan <sup>1,3,\*</sup> and Minyi Xu <sup>1,\*</sup>

- <sup>1</sup> Dalian Key Lab of Marine Micro/Nano Energy and Self-Powered System, Marine Engineering College Dalian Maritime University, Dalian 116026, China; yuanhc@dlmu.edu.cn (H.Y.); yuhongyong2020@dlmu.edu.cn (H.Y.); simonlxy@dlmu.edu.cn (X.L.); zyp672216686@dlmu.edu.cn (Y.Z.); yyds@dlmu.edu.cn (Z.X.); qiqizhang@dlmu.edu.cn (Q.Z.); pinky@dlmu.edu.com (L.L.); linyj@dlmu.edu.cn (Y.L.)
- <sup>2</sup> Tsinghua-Berkeley Shenzhen Institute, Tsinghua Shenzhen International Graduate School, Tsinghua University, Shenzhen 518055, China; zhaohf21@mails.tsinghua.edu.cn
- <sup>3</sup> School of Electronics and Information Technology, Guangdong Ocean University, Zhanjiang 524088, China
- \* Correspondence: linyj@dlmu.edu.cn (Y.L.); panxx@dlmu.edu.cn (X.P.); xuminyi@dlmu.edu.cn (M.X.)
- † Haichao Yuan and Hongyong Yu equally contributed to this work.

## Supporting Figures

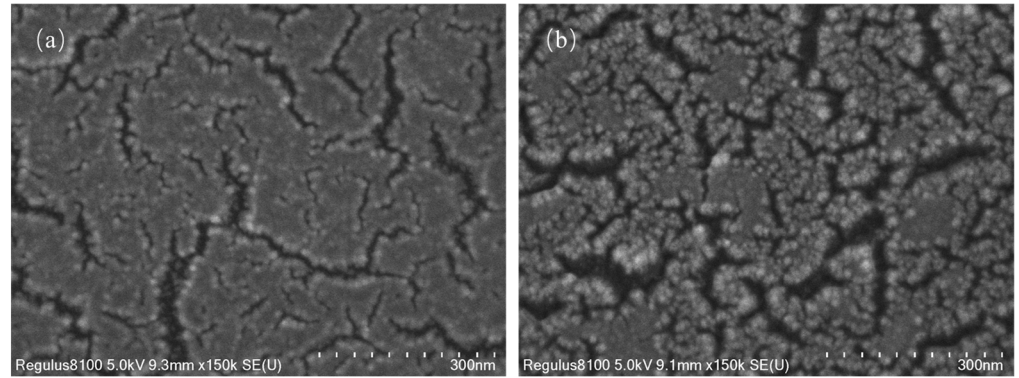

Figure S1. Surface topography image of (a) the normal FEP film and (b) the polished FEP film.

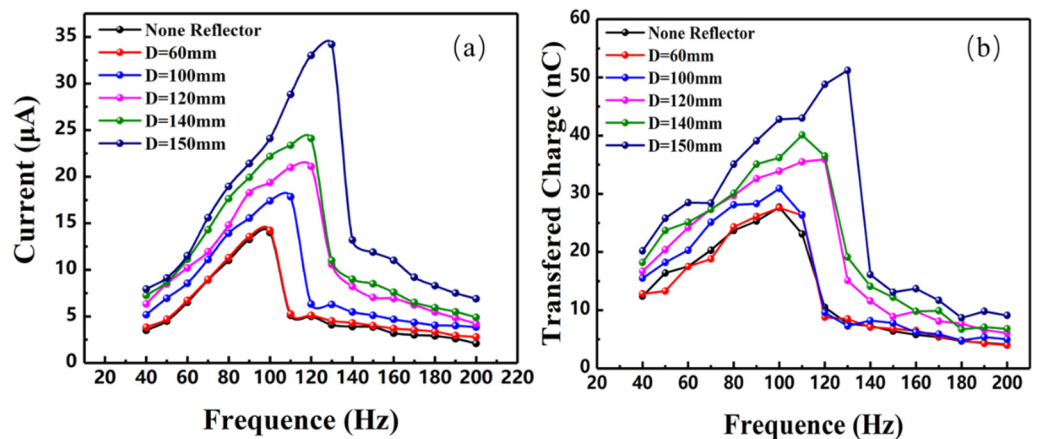

Figure S2. Output performances of the CHR-TENGs. (a) The short-circuit current and (b) transfer charge of the CHR-TENGs with different reflector sizes under the same acoustic wave condition with the acoustic frequency ranging from 40 to 200 Hz.

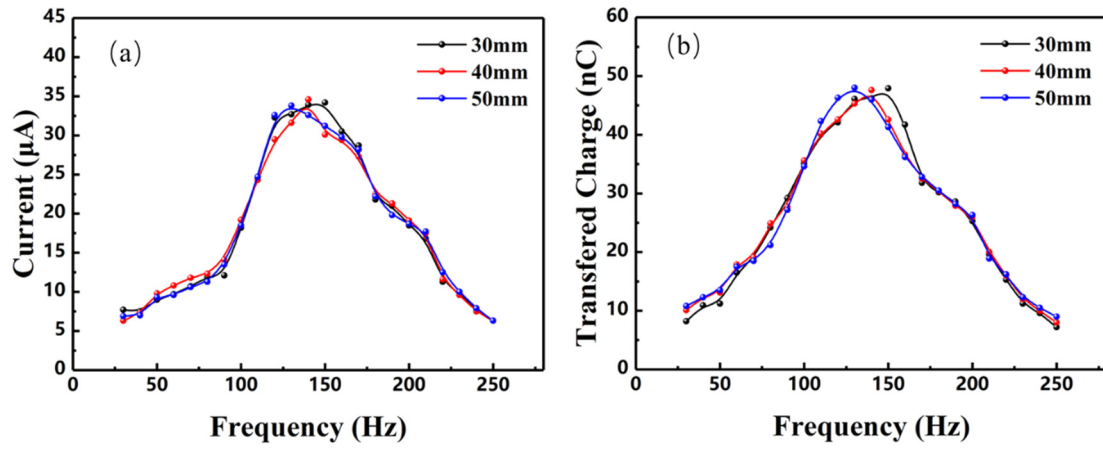

**Figure S3.** Output performances of the CHR-TENGs. (a) The short-circuit current and (b) transfer charge of the CHR-TENGs with different resonator thicknesses under the same acoustic wave condition with the acoustic frequency ranging from 40 to 250 Hz.

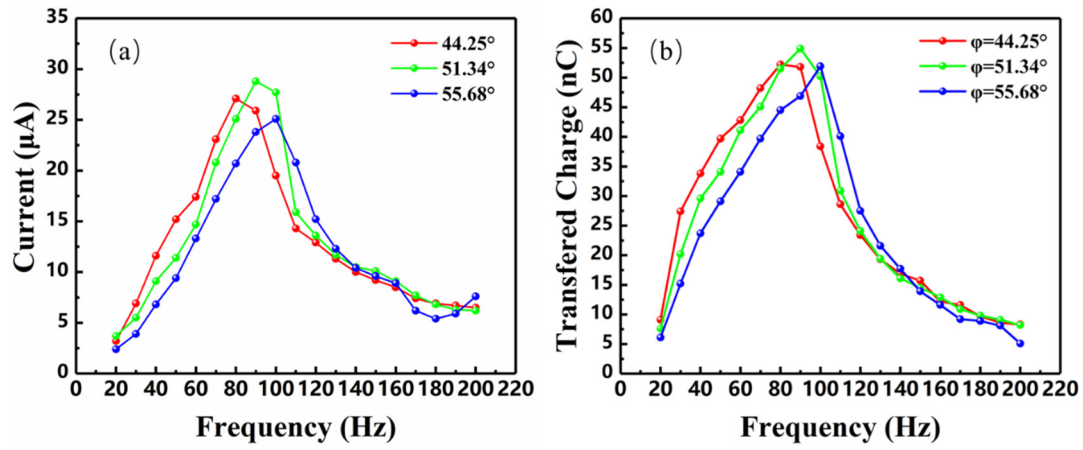

**Figure S4.** Output performances of the CHR-TENGs. (a) The short-circuit current and (b) transfer charge of the CHR-TENGs with different conform angles under the same acoustic wave condition with the acoustic frequency ranging from 20 to 200 Hz.

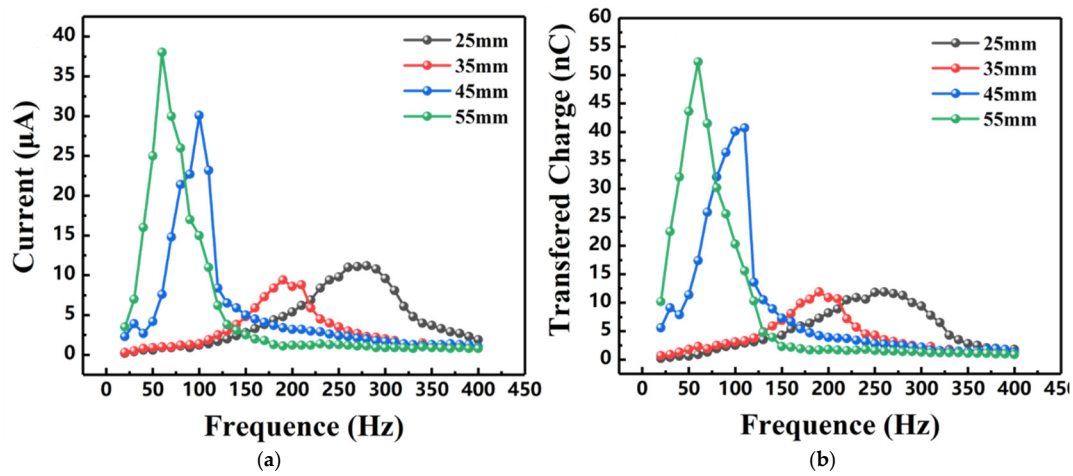

**Figure S5.** Output performances of the CHR-TENGs. (a) The short-circuit current and (b) transfer charge of the CHR-TENGs with varied FEP film sizes under the same acoustic wave condition with the acoustic frequency ranging from 20 to 400 Hz.

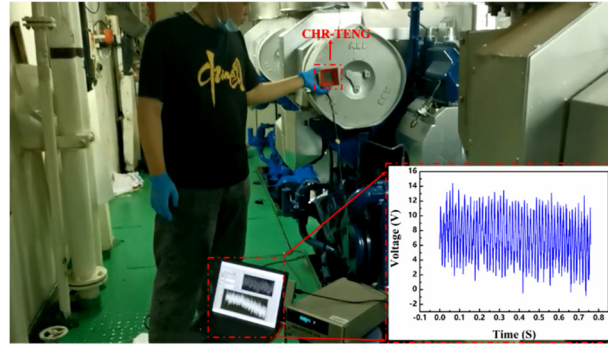

(a)

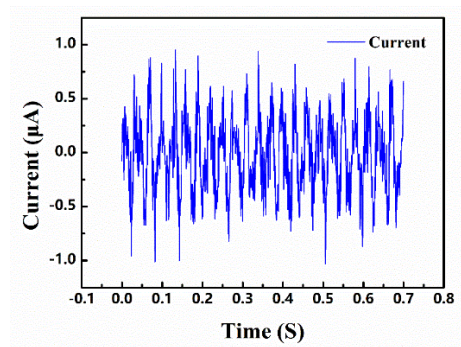

(b)

**Figure S6.** Schematic diagram of the CHR-TENG harvesting ship acoustic energy in a ship engine room. (a) open-circuit voltage and (b) short-circuit current.

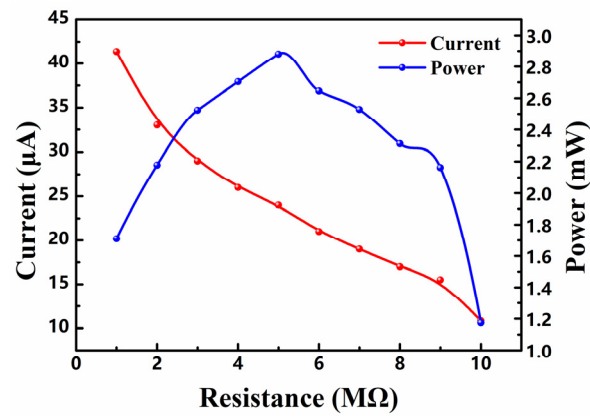

**Figure S7.** Power output performance of the CHR-TENG under the acoustic pressure level of 90 dB and acoustic frequency of 140Hz.

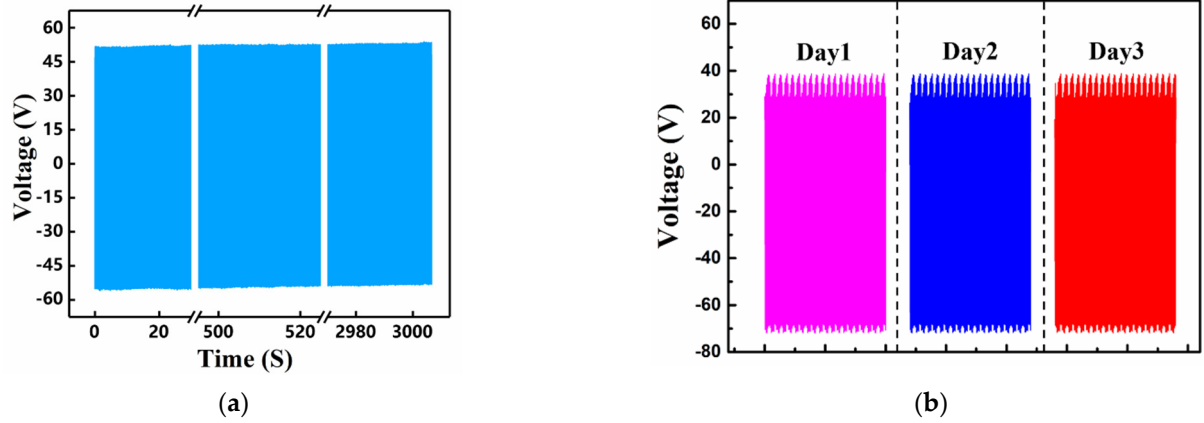

**Figure S8.** Test of the stability output performance of the CHR-TENG under acoustic condition of sound pressure level 90dB and frequency 140Hz. (a) single test result and (b) comparison of the three day's output performance test.

Simulation conditions of COMSOL Multiphysics:

1. Ideal conditions: It is assumed that the sound pressure from the speaker is the incident sound pressure, regardless of the loss into the device; the pressure behind the membrane is the standard atmospheric pressure.
2. In the simulation, it is assumed that the membrane is rigid, there is no displacement, and only the sound pressure level is concerned.
3. The sound moves in one direction, regardless of sound refraction.

### Supporting Tables

**Table S1.** Acoustic levels in various transportation scenarios.

| Acoustic levels    | Airport                                                                   | Ship                                                | Road                                                        |
|--------------------|---------------------------------------------------------------------------|-----------------------------------------------------|-------------------------------------------------------------|
| Acoustic pressure  | normally about 75dB,<br>over 100dB when air-<br>plane take-off or landing | over 100dB (when<br>the diesel engine run-<br>ning) | 60-90db                                                     |
| Acoustic frequency | <250Hz                                                                    | 31.5~500Hz                                          | 63Hz (corresponding<br>frequency of the maxi-<br>mum noise) |

**Table S2.** Power density comparison with previously acoustic energy harvesters.

| No. | Author(s)               | Type                                                       | Acoustic condi-<br>tion | Electrical output          | Dimension (mm)                | Ref. No. |
|-----|-------------------------|------------------------------------------------------------|-------------------------|----------------------------|-------------------------------|----------|
| 1   | F. U. Khan and<br>Izhar | Electromagnetic method                                     | 144 Hz<br>120 dB        | 315 mV,<br>1.503 mW        | Magnet 1.6×6.35<br>Coil 33×12 | [46]     |
| 2   | S. Qi                   | Acoustic metamaterial<br>with piezoelectric mate-<br>rial  | 2257.5 Hz<br>100 dB     | 1.3 V<br>8.8 μW            | 60×60×5.4                     | [9]      |
| 3   | S. N. Cha               | Piezoelectric nanowire                                     | 100 Hz<br>100 dB        | 50 mV<br>0.3 μW            | 10 × 10                       | [44]     |
| 4   | B. Li                   | PZT piezoelectric plates                                   | 199 Hz<br>100 dB        | 1.75 V<br>0.65 mW          | 40×20×0.48                    | [47]     |
| 5   | A. Yang                 | PZT plate with Sonic<br>Crystal and Helmholtz<br>resonator | 5.545 KHz<br>110 dB     | 3.89 V<br>429 μW           | 32 × 12                       | [13]     |
| 6   | X. Fan                  | TENG with PTFE                                             | 320 Hz<br>117 dB        | About 79 V<br>About 8.5 mA | Not specified                 | [34]     |
| 7   | J. Yang                 | TENG with PTFE                                             | 240 Hz                  | 60.5 V                     | Radius 65                     | [45]     |

|    |         |                |                            |                                 |                         |      |
|----|---------|----------------|----------------------------|---------------------------------|-------------------------|------|
| 8  | N. Cui  | TENG with PVDF | 110 dB<br>175 Hz<br>114 dB | 15.1 $\mu$ A<br>90 V<br>0.45 mA | 100×100                 | [40] |
| 9  | J. Liu  | TENG with PVDF | 200 Hz<br>105 dB           | 232 V<br>More than 1<br>mA      | 1 and 5 plates<br>95×95 | [48] |
| 10 | F. Chen | TENG with PVDF | 170 Hz<br>115 dB           | 400 V<br>175 $\mu$ A            | Radius 80               | [32] |
| 11 | H.Zhao  | TENG with FEP  | 80 Hz<br>89.1 dB           | 140 V<br>60 $\mu$ A             | 45× 45 ×0.05            | [33] |
| 12 | M.Yuan  | TENG with FEP  | 88Hz<br>100dB              | 4.33mW                          | Radius 80               | [31] |
| 13 | Z.Wang  | TENG with FEP  | 170Hz<br>110dB             | 500V<br>124 $\mu$ A             | Radius 80               | [41] |
| 14 | Present | TENG with FEP  | 140Hz<br>90dB              | 167V<br>48 $\mu$ A              | Radius 45               |      |

---
